# Supplementary material
Source: PubMed Central journal article supplement (PMC3118554)
Supplement: NIHMS285861-supplement-01.pdf [file NIHMS285861-supplement-01.pdf]

## Supplementary Information for “Mapping gene expression in two *Xenopus* species: evolutionary constraints and developmental flexibility” Itai Yanai, Leonid Peshkin, Paul Jorgensen, and Marc W. Kirschner

### SUPPLEMENTAL DATA

#### **Figure S1. Microarray data reproducibility and microarray design, related to Figure 1. a)**

Estimating the reproducibility of the microarray data using technical replicates. Two samples, each of 1  $\mu$ g, from the same total RNA (one *X. laevis* stage 23 embryo) were taken for amplification, cy3 labeling, microarray hybridization, and normalization. The correlation coefficient between the two microarrays is 0.991. **b)** Properties of the microarray designs. Distribution of GC-content of the 43,803 60-mer probes on both microarrays. **c)** Additional properties of the microarray probes. Shown are the distributions of melting temperature, folding score, complexity score, and 3'-position score as given by the OligoWiz2 (Wernersson and Nielsen 2005).

#### **Figure S2. Figure S2. Controls for estimating microarray quality, related to Figure 2. a)**

Comparison of the microarray data with a previously published set. The Baldessari et al. dataset (Baldessari, Shin et al. 2005) on *X. laevis* was compared for the 2,974 genes common to both in stage 13. We find a correlation of  $R=0.57$  among the datasets. Genes were matched using *X. laevis* accession IDs. **b)** Control for different temperatures. Since *X. laevis* and *X. tropicalis* embryos were isolated in different temperatures (22°C and 28°C, respectively) we tested whether this might introduce a confounding effect. We isolated stage 10 *X. tropicalis* embryos for both temperatures and examined their transcriptomes. A principle components analysis revealed that the Stage 10 embryos cluster together regardless of temperature. The little variation that is observed in the Stage 10 transcriptomes across the second principle component is not greater than that seen in the previous stage. Furthermore the second component captures far less of the variation across these samples than the first, 22% and 57% respectively. We conclude that the difference in temperatures does not confound the cross-species comparisons. The principle components analysis was computed on the set of dynamically expressed genes (see Experimental Procedures).

#### **Figure S3. Expression divergences across all genes and in specific pathways, related to Figure 3. a)**

Distribution of  $ED_i$  for the examined genes. The expression divergence index ( $ED_i$ ) of all 11,095 orthologs was computed as described in Experimental Procedures. **b)** Expression profiles of members of the Membrane attack complex (MAC). *X. tropicalis* (green) and *X. laevis* (blue) profiles are shown. For each set of profiles the  $t_1$ 's are indicated. **c)** The mean expression profiles of ribosomal genes in both species. **d)** Expression profiles of the ‘heterochronic pathway’ gene *lin-41* and *lin-28*.

#### **Figure S4. Heterometry in a developmental pathway, related to Figure 4. a)**

Relationship between the differences in 3'UTR lengths and differences in gene expression levels. For the 150 genes with the most  $ED_i$  differences (Table S1), 26 had known mRNAs for both *X. laevis* and *X. tropicalis* in Refseq (Pruitt and Maglott 2001). The length of the 3'UTR was computed as the differences between the length of the transcript and the location of last exon. The difference in expression level was computed as the difference in the sums of the orthologous profiles. The plot shows for each ortholog pair the difference in 3'UTR as a function of its change in expression level. While for the extreme 3'UTR differences there was an

associated difference in detected expression level, presumably due to more efficient reverse transcription at the start of the amplification protocol (see Experimental Procedures), the dominant majority of the differences in expression levels are not associated with a correlated difference in 3'UTR length. **b)** Expression profiles of the core members in the hedgehog signaling pathway. Profiles are shown in the same format as Fig. 1b.

**Figure S5. Supplemental analyses regarding the convergence of the developmental transcriptome, related to Figure 5.** In same format as Fig. 5d: **a)** The number of genes with a maternal profiles (66 genes, cluster is shown in dark blue in Fig. 1c) that differ at each stage. **b)** The number of genes different at each stage between *X. laevis* clutch 1 and *X. laevis* clutch 3. **c)** The number of genes different at each stage between *X. tropicalis* clutch 1 and *X. tropicalis* clutch 3.

**Table S1. Expression divergence index ( $ED_i$ ) for all examined orthologs, related to Figure 3.** The columns correspond to ensemble ID,  $ED_i$ , gene symbol, and description. This table is located in a separate document.

**Table S2. Comparative expression profiles for genes with conserved, heterochronic, heterometric, convergent patterns, related to Figures 1, 4, and 6.** More information regarding each gene is given in Table S1. This table is located in a separate document.

**Table S3. Gene sets with low expression divergence between species, related to Figure 3**

| Gene set                                          | Mean $ED_i$<br>relative to mean<br>of all genes | $-\log_{10}(p)$ | number<br>of genes |
|---------------------------------------------------|-------------------------------------------------|-----------------|--------------------|
| structural constituent of ribosome                | 0.25                                            | 16              | 56                 |
| ribosomal proteins                                | 0.29                                            | 17              | 63                 |
| mRNA splice site selection                        | 0.30                                            | 3               | 11                 |
| intercalated disc                                 | 0.30                                            | 2               | 4                  |
| protein amino acid lipidation                     | 0.31                                            | 4               | 13                 |
| lipoprotein biosynthetic process                  | 0.31                                            | 4               | 13                 |
| RNA dependent atpase activity                     | 0.33                                            | 3               | 13                 |
| lipoprotein metabolic process                     | 0.34                                            | 3               | 15                 |
| ATP dependent RNA helicase activity               | 0.35                                            | 3               | 12                 |
| protein targeting to mitochondrion                | 0.35                                            | 2               | 6                  |
| RNA helicase activity                             | 0.35                                            | 4               | 19                 |
| translation initiation factor activity            | 0.36                                            | 2               | 15                 |
| carbohydrate transmembrane transporter activity   | 0.36                                            | 2               | 6                  |
| mRNA binding activity                             | 0.37                                            | 2               | 8                  |
| translational initiation                          | 0.38                                            | 2               | 15                 |
| TCA                                               | 0.41                                            | 2               | 12                 |
| proteasome pathway                                | 0.42                                            | 2               | 19                 |
| regulation of cellular pH                         | 0.42                                            | 2               | 7                  |
| cellular monovalent inorganic cation homeostasis  | 0.42                                            | 2               | 7                  |
| proteasome                                        | 0.44                                            | 2               | 15                 |
| intrinsic to endoplasmic reticulum membrane       | 0.44                                            | 3               | 17                 |
| integral to endoplasmic reticulum membrane        | 0.44                                            | 3               | 17                 |
| HDAC pathway                                      | 0.48                                            | 2               | 21                 |
| ATP dependent helicase activity                   | 0.51                                            | 2               | 20                 |
| glycerophospholipid biosynthetic process          | 0.52                                            | 2               | 17                 |
| translation factors                               | 0.52                                            | 4               | 37                 |
| mitochondrial membrane part                       | 0.53                                            | 3               | 39                 |
| intrinsic to organelle membrane                   | 0.53                                            | 3               | 36                 |
| integral to organelle membrane                    | 0.54                                            | 3               | 34                 |
| aguirre pancreas                                  | 0.54                                            | 2               | 33                 |
| phosphoinositide biosynthetic process             | 0.56                                            | 2               | 15                 |
| outer membrane                                    | 0.56                                            | 2               | 19                 |
| glycerophospholipid metabolic process             | 0.56                                            | 2               | 25                 |
| protein RNA complex assembly                      | 0.58                                            | 3               | 39                 |
| phospholipid biosynthetic process                 | 0.58                                            | 2               | 21                 |
| organelle outer membrane                          | 0.58                                            | 2               | 18                 |
| organelle inner membrane                          | 0.59                                            | 3               | 55                 |
| ribonucleoprotein complex biogenesis and assembly | 0.59                                            | 2               | 50                 |
| ubiquitin mediated proteolysis                    | 0.59                                            | 2               | 20                 |
| MAPK cascade                                      | 0.59                                            | 2               | 22                 |
| mitochondrial inner membrane                      | 0.60                                            | 3               | 48                 |

|                                                                     |      |   |     |
|---------------------------------------------------------------------|------|---|-----|
| mitochondrial envelope                                              | 0.60 | 3 | 69  |
| mitochondrial membrane                                              | 0.60 | 3 | 63  |
| regulation of gene specific transcription                           | 0.60 | 2 | 8   |
| mRNA processing                                                     | 0.60 | 3 | 37  |
| yagi aml prognosis                                                  | 0.60 | 2 | 21  |
| translation                                                         | 0.61 | 6 | 93  |
| helicase activity                                                   | 0.61 | 3 | 38  |
| mRNA splicing                                                       | 0.61 | 4 | 41  |
| circadian exercise                                                  | 0.61 | 2 | 34  |
| membrane lipid biosynthetic process                                 | 0.63 | 2 | 27  |
| RNA binding                                                         | 0.63 | 8 | 167 |
| mootha voxPhos                                                      | 0.64 | 2 | 55  |
| Eif2 pathway                                                        | 0.65 | 2 | 8   |
| envelope                                                            | 0.67 | 3 | 123 |
| organelle envelope                                                  | 0.67 | 3 | 123 |
| aguirre pancreas chr1                                               | 0.69 | 2 | 24  |
| ribonucleoprotein complex                                           | 0.69 | 4 | 91  |
| mitochondrial part                                                  | 0.69 | 3 | 102 |
| RNA processing                                                      | 0.70 | 3 | 121 |
| Toll pathway                                                        | 0.71 | 2 | 25  |
| RNA splicing                                                        | 0.71 | 4 | 72  |
| mRNA metabolic process                                              | 0.72 | 2 | 55  |
| ATPase activity                                                     | 0.72 | 2 | 76  |
| response to light stimulus                                          | 0.72 | 2 | 23  |
| protein catabolic process                                           | 0.73 | 2 | 53  |
| mRNA processing go 0006397                                          | 0.73 | 2 | 52  |
| organelle membrane                                                  | 0.74 | 4 | 205 |
| ATPase activity coupled                                             | 0.74 | 2 | 64  |
| macromolecule biosynthetic process                                  | 0.74 | 6 | 173 |
| mRNA processing reactome                                            | 0.74 | 3 | 90  |
| nucleolus                                                           | 0.76 | 3 | 71  |
| structural molecule activity                                        | 0.77 | 8 | 123 |
| RNA polymerase ii transcription factor activity                     | 0.77 | 2 | 115 |
| basso regulatory hubs                                               | 0.78 | 2 | 91  |
| endomembrane system                                                 | 0.79 | 2 | 143 |
| generation of precursor metabolites and energy                      | 0.80 | 2 | 78  |
| mitoDB 6 2002                                                       | 0.81 | 4 | 282 |
| mitochondrion                                                       | 0.81 | 2 | 225 |
| endoplasmic reticulum                                               | 0.81 | 3 | 173 |
| mitochondria                                                        | 0.82 | 4 | 298 |
| flotho casp8ap2 mrd diff                                            | 0.82 | 2 | 53  |
| RNA metabolic process                                               | 0.83 | 3 | 537 |
| nuclear part                                                        | 0.84 | 3 | 367 |
| macromolecular complex                                              | 0.84 | 4 | 588 |
| tarte plasma blastic                                                | 0.85 | 2 | 228 |
| intracellular organelle part                                        | 0.86 | 3 | 748 |
| organelle part                                                      | 0.86 | 3 | 752 |
| pgc                                                                 | 0.86 | 2 | 242 |
| protein complex                                                     | 0.87 | 2 | 507 |
| nucleobase nucleoside nucleotide and nucleic acid metabolic process | 0.87 | 2 | 783 |
| nucleus                                                             | 0.87 | 3 | 887 |
| nuclear lumen                                                       | 0.87 | 2 | 238 |
| organelle lumen                                                     | 0.87 | 2 | 287 |
| membrane enclosed lumen                                             | 0.87 | 2 | 287 |
| cellular biosynthetic process                                       | 0.88 | 2 | 181 |
| jison sicklecell diff                                               | 0.89 | 3 | 202 |
| cellular protein metabolic process                                  | 0.89 | 2 | 653 |
| pyrophosphatase activity                                            | 0.90 | 2 | 145 |
| biosynthetic process                                                | 0.91 | 2 | 267 |

**Table S4. Gene sets with high expression divergence between species, related to Figure 3.**

| Gene set                                        | Mean $ED_i$<br>relative to mean<br>of all genes | $-\log_{10}(p)$ | number<br>of genes |
|-------------------------------------------------|-------------------------------------------------|-----------------|--------------------|
| glucocorticoid mineralocorticoid metabolism     | 4.13                                            | 3               | 4                  |
| alternative pathway                             | 3.19                                            | 3               | 5                  |
| c21 steroid hormone metabolism                  | 3.17                                            | 3               | 6                  |
| oxygen binding                                  | 3.00                                            | 2               | 7                  |
| icosanoid metabolic process                     | 2.91                                            | 3               | 9                  |
| PLCD pathway                                    | 2.86                                            | 2               | 3                  |
| acetaminophen pathway                           | 2.62                                            | 2               | 2                  |
| gpcrs class c metabotropic glutamate pheromone  | 2.41                                            | 2               | 4                  |
| gpcrdb class c metabotropic glutamate pheromone | 2.41                                            | 2               | 4                  |
| riboflavin metabolism                           | 2.19                                            | 2               | 6                  |
| SHH pathway                                     | 2.09                                            | 2               | 9                  |
| kinase activator activity                       | 2.04                                            | 2               | 6                  |
| oxidoreductase activity go 0016705              | 2.03                                            | 2               | 24                 |
| regulation of axonogenesis                      | 1.99                                            | 2               | 6                  |
| nicotinate and nicotinamide metabolism          | 1.97                                            | 2               | 9                  |
| serine type endopeptidase inhibitor activity    | 1.94                                            | 2               | 11                 |
| protease inhibitor activity                     | 1.92                                            | 2               | 14                 |
| hdaci colon cluster7                            | 1.90                                            | 2               | 10                 |
| fatty acid metabolic process                    | 1.88                                            | 3               | 31                 |
| regulation of neurogenesis                      | 1.87                                            | 2               | 8                  |
| carm1 pathway                                   | 1.82                                            | 2               | 9                  |
| mouse tissue kidney                             | 1.75                                            | 2               | 3                  |
| prostaglandin synthesis regulation              | 1.70                                            | 2               | 19                 |
| histone acetyltransferase activity              | 1.67                                            | 2               | 11                 |
| ross fab m7                                     | 1.62                                            | 2               | 32                 |
| chemical pathway                                | 1.53                                            | 2               | 17                 |
| il10 pathway                                    | 1.53                                            | 2               | 6                  |
| cell cycle checkpoint ii                        | 1.49                                            | 2               | 6                  |
| negative regulation of hydrolase activity       | 1.48                                            | 3               | 10                 |
| insoluble fraction                              | 1.47                                            | 2               | 9                  |
| gluconeogenesis                                 | 1.47                                            | 2               | 34                 |
| glycolysis                                      | 1.47                                            | 2               | 34                 |
| negative regulation of map kinase activity      | 1.44                                            | 2               | 12                 |
| contractile fiber                               | 1.44                                            | 2               | 16                 |
| contractile fiber part                          | 1.44                                            | 2               | 16                 |
| bystrykh hsc cis glocus                         | 1.40                                            | 2               | 74                 |
| zhan mm cd138 cd2 vs rest                       | 1.37                                            | 2               | 18                 |
| passerini adhesion                              | 1.33                                            | 2               | 23                 |
| jison sickle cell                               | 1.33                                            | 2               | 21                 |
| carboxylesterase activity                       | 1.32                                            | 2               | 14                 |
| positive regulation of map kinase activity      | 1.31                                            | 2               | 22                 |
| deaminase activity                              | 1.29                                            | 2               | 7                  |
| magnesium ion binding                           | 1.29                                            | 2               | 36                 |
| regulation of map kinase activity               | 1.29                                            | 2               | 36                 |
| iritani adprox vasc                             | 1.29                                            | 2               | 92                 |
| hsiao liver specific genes                      | 1.28                                            | 3               | 121                |
| bystrykh hsc brain cis glocus                   | 1.28                                            | 2               | 36                 |
| negative regulation of catalytic activity       | 1.27                                            | 3               | 43                 |
| regulation of hydrolase activity                | 1.25                                            | 2               | 41                 |

|                                          |      |   |     |
|------------------------------------------|------|---|-----|
| myosin complex                           | 1.23 | 2 | 9   |
| caspase activation                       | 1.23 | 2 | 14  |
| digestion                                | 1.23 | 2 | 14  |
| zpositive regulation of caspase activity | 1.19 | 2 | 15  |
| receptor binding                         | 1.19 | 2 | 146 |
| chesler brain highest variance genes     | 1.18 | 2 | 14  |
| MAPKKK cascade go 0000165                | 1.17 | 2 | 52  |
| cytoskeletal protein binding             | 1.16 | 2 | 90  |
| ray p210 diff                            | 1.14 | 2 | 33  |
| spindle pole                             | 1.14 | 2 | 11  |
| ichiba gvhd                              | 1.13 | 2 | 126 |
| integral to plasma membrane              | 1.13 | 2 | 370 |
| intrinsic to plasma membrane             | 1.13 | 2 | 373 |
| cytoskeletal part                        | 1.12 | 2 | 130 |
| ion binding                              | 1.11 | 2 | 148 |
| nuclear import                           | 1.07 | 2 | 31  |
| protein import into nucleus              | 1.07 | 2 | 31  |
| cytoskeleton                             | 1.07 | 2 | 202 |
| identical protein binding                | 1.07 | 2 | 197 |
| passerini signal                         | 1.06 | 3 | 194 |
| extracellular region                     | 1.06 | 2 | 163 |
| butanoate metabolism                     | 1.03 | 2 | 19  |
| spindle                                  | 1.01 | 2 | 26  |
| extrinsic pathway                        | 1.01 | 2 | 9   |

**Table S5. Maternal transcriptome conservations between species, related to Figure 6.**

| Gene set                                 | Mean $ED_i$<br>relative to mean<br>of all genes | $-\log_{10}(p)$ | number<br>of genes |
|------------------------------------------|-------------------------------------------------|-----------------|--------------------|
| TCA                                      | 0.144238                                        | 2               | 12                 |
| Ribosome Biogenesis And Assembly         | 0.179121                                        | 2               | 11                 |
| Aston Oligodendroglia Myelination Subset | 0.209767                                        | 2               | 8                  |
| Nucleotide Sugar Metabolic Process       | 0.216904                                        | 2               | 8                  |
| Human Tissue Liver                       | 0.228056                                        | 3               | 15                 |
| mRNA Binding Activity                    | 0.236843                                        | 2               | 8                  |
| Smooth Muscle Contraction Go 0006939     | 0.26813                                         | 2               | 6                  |
| Lian Myeloid Diff Receptors              | 0.324017                                        | 2               | 10                 |
| Hdac Pathway                             | 0.371615                                        | 2               | 21                 |
| Coenzyme Metabolic Process               | 0.402755                                        | 2               | 25                 |
| Proteasome pathway                       | 0.415485                                        | 2               | 19                 |
| Krebs TCA Cycle                          | 0.418889                                        | 2               | 24                 |
| Basal Lamina                             | 0.426465                                        | 2               | 11                 |
| Structural Constituent Of Ribosome       | 0.472452                                        | 2               | 56                 |
| Cellular Protein Catabolic Process       | 0.528254                                        | 2               | 44                 |
| Protein Catabolic Process                | 0.54397                                         | 2               | 53                 |
| mRNA Splicing                            | 0.558102                                        | 2               | 41                 |
| Ribosomal Proteins                       | 0.562756                                        | 2               | 63                 |
| Ribonucleoprotein Complex                | 0.571653                                        | 2               | 91                 |
| Translation Factors                      | 0.580485                                        | 2               | 37                 |

**Table S6. Maternal transcriptome divergences between species, related to Figure 6.**

| Gene set                                             | Mean $ED_i$<br>relative to mean<br>of all genes | $-\log_{10}(p)$ | number<br>of genes |
|------------------------------------------------------|-------------------------------------------------|-----------------|--------------------|
| Acetaminophen pathway                                | 6.28658                                         | 2               | 12                 |
| Glucocorticoid Mineralocorticoid Metabolism          | 5.837434                                        | 2               | 11                 |
| C21 Steroid Hormone Metabolism                       | 4.857145                                        | 2               | 8                  |
| Oxygen Binding                                       | 3.885952                                        | 2               | 8                  |
| Msp pathway                                          | 3.62922                                         | 2               | 15                 |
| Metabotropic Glutamate Gaba B Like Receptor Activity | 3.558569                                        | 2               | 8                  |
| Icosanoid Metabolic Process                          | 3.307843                                        | 2               | 6                  |
| Sa Mmp Cytokine Connection                           | 3.232155                                        | 2               | 10                 |
| Kinase Activator Activity                            | 3.21782                                         | 3               | 21                 |
| Monooxygenase Activity                               | 2.940834                                        | 2               | 25                 |
| Oxidoreductase Activity Go 0016705                   | 2.767711                                        | 2               | 19                 |
| Cell Substrate Adherens Junction                     | 2.757285                                        | 2               | 24                 |
| Focal Adhesion                                       | 2.757285                                        | 2               | 11                 |
| Prostaglandin Synthesis Regulation                   | 2.726806                                        | 2               | 56                 |
| Rankl pathway                                        | 2.689907                                        | 2               | 44                 |
| Rho Guanyl Nucleotide Exchange Factor Activity       | 2.43933                                         | 2               | 53                 |
| Uvb Nhek1 C4                                         | 2.345788                                        | 2               | 41                 |
| Tall1 pathway                                        | 2.246784                                        | 2               | 63                 |
| Exocytosis                                           | 2.13868                                         | 3               | 91                 |
| Positive Regulation Of Immune Response               | 2.134036                                        | 2               | 37                 |

**SUPPLEMENTAL EXPERIMENTAL PROCEDURES**

**Xenopus orthology.** *X. tropicalis* sequences for 18,025 genes based upon the genome sequencing project (Hellsten, Harland et al. 2010) were retrieved from Ensembl database (Hubbard, Aken et al. 2009). In the absence of a draft genomic sequence for *X. laevis* we used 35,523 sequences from Unigene and 39,724 sequences from the TIGR indices. We searched for significant blastn alignments among these DNA sequences of  $\geq 100$ bp, an E-value  $\leq 10^{-15}$ , and spanning  $\geq 30\%$  the length of the shorter aligned sequence. We then searched for a bi-directional best hit (BBH) between each *X. tropicalis* gene (*Xt*) and found such relationships for 10,719 genes. 376 *Xt* genes did not have a BBH but the aligned region was determined to be unique by additional searches and these genes formed additional clusters. These 11,095 clusters with sequences from either species form the primary group of clusters examined in the manuscript. 1,656 *Xt* genes were identified as in-paralogs (more similar to an *Xt* gene than the best aligning *Xl* gene) and were added to the 356 clusters they matched. For the remaining 5,151 *Xt* genes, we did not find an *Xl* hit, or (for 136 genes) a weak hit with 5% identity worse than the alignment with the BBH between the *Xl* gene and *Xt* gene it hits best. This group of 5,151 genes formed 5,015 clusters based upon close similarities ( $\geq 95\%$  identity) form the secondary group of clusters.

**Microarray probe design.** Each cluster is associated with one sequence for either species. In clusters with members from both species (primary group) the sequences are based upon the bi-directional best hit pair. In clusters of the secondary group, the *Xt* gene sequences is used for both species. Sequences were exon separated to avoid assigning probes spanning splice sites that are more prone to misannotation. The exonized *Xl* sequence was inferred by joining *Xl* sequences that aligned to the *Xt* Ensembl exons by blastn. We next identified probes using the OligoWiz2 software (Wernersson and Nielsen 2005). Each probe was selected based upon its score:  $S_{probe} = \Delta T_m w_{\Delta T_m} + Fw_F + Cw_C + Pw_P + Sw_S$ , where  $S_{probe}$  is

the score of a 60-mer probe,  $\Delta T_m$  is the melting temperature score that favors probes with a melting temperature closest to the array average,  $F$  is a folding score that penalizes probes likely to undergo folding,  $C$  is a low-complexity score that penalizes probes with common subsequences,  $P$  is a position score that favors probes closer to the 3' end of the transcript,  $S$  is a similarity score that penalizes probes that are not also similar to any in-paralogs. The weights were set to:

$w_{\Delta T_m} = .25; w_F = .15; w_C = .15; w_P = .25; w_S = .2$ . The  $Xt$  and  $Xl$  probes were paired and to each an average score was assigned. Probes were then allocated to clusters based upon their scores. Wherever probes pairs scores were similar those that did not overlap were selected. Primary and secondary clusters were assigned three and two probes, respectively, on the 43,803 probe microarray. To fill the microarray, 192 secondary clusters were assigned an additional probe. Figure S9 provides the properties of the probes.

**Open-access data browsers.** We developed a web-based browser for the gene expression dataset with URL [http://kirschner.med.harvard.edu/Xenopus\\_Transcriptomics.html](http://kirschner.med.harvard.edu/Xenopus_Transcriptomics.html) that provides a summary of expression profiles, averaged over the three clutches, where the two curves reflecting *X. laevis* and *X. tropicalis* profiles are superimposed for direct comparison. Genes are referred to by a 5-digit identifier which is the suffix of the Ensembl gene ID of the *X. tropicalis* ortholog. For example, a gene named "SSH" is identified as 13504 since its ID is ENSXETG00000013504. Since annotations for many *Xenopus* genes are often incomplete and sometimes inaccurate, it may be necessary to match by sequence similarity the query sequence to the *X. tropicalis* genome.

#### SUPPLEMENTAL REFERENCES

- Baldessari, D., Y. Shin, et al. (2005). "Global gene expression profiling and cluster analysis in *Xenopus laevis*." *Mech Dev* **122**(3): 441-75.
- Hellsten, U., R. M. Harland, et al. (2010). "The genome of the Western clawed frog *Xenopus tropicalis*." *Science* **328**(5978): 633-6.
- Hubbard, T. J., B. L. Aken, et al. (2009). "Ensembl 2009." *Nucleic Acids Res* **37**(Database issue): D690-7.
- Pruitt, K. D. and D. R. Maglott (2001). "RefSeq and LocusLink: NCBI gene-centered resources." *Nucleic Acids Res* **29**(1): 137-40.
- Wernersson, R. and H. B. Nielsen (2005). "OligoWiz 2.0--integrating sequence feature annotation into the design of microarray probes." *Nucleic Acids Res* **33**(Web Server issue): W611-5.



# Supplemental Figures

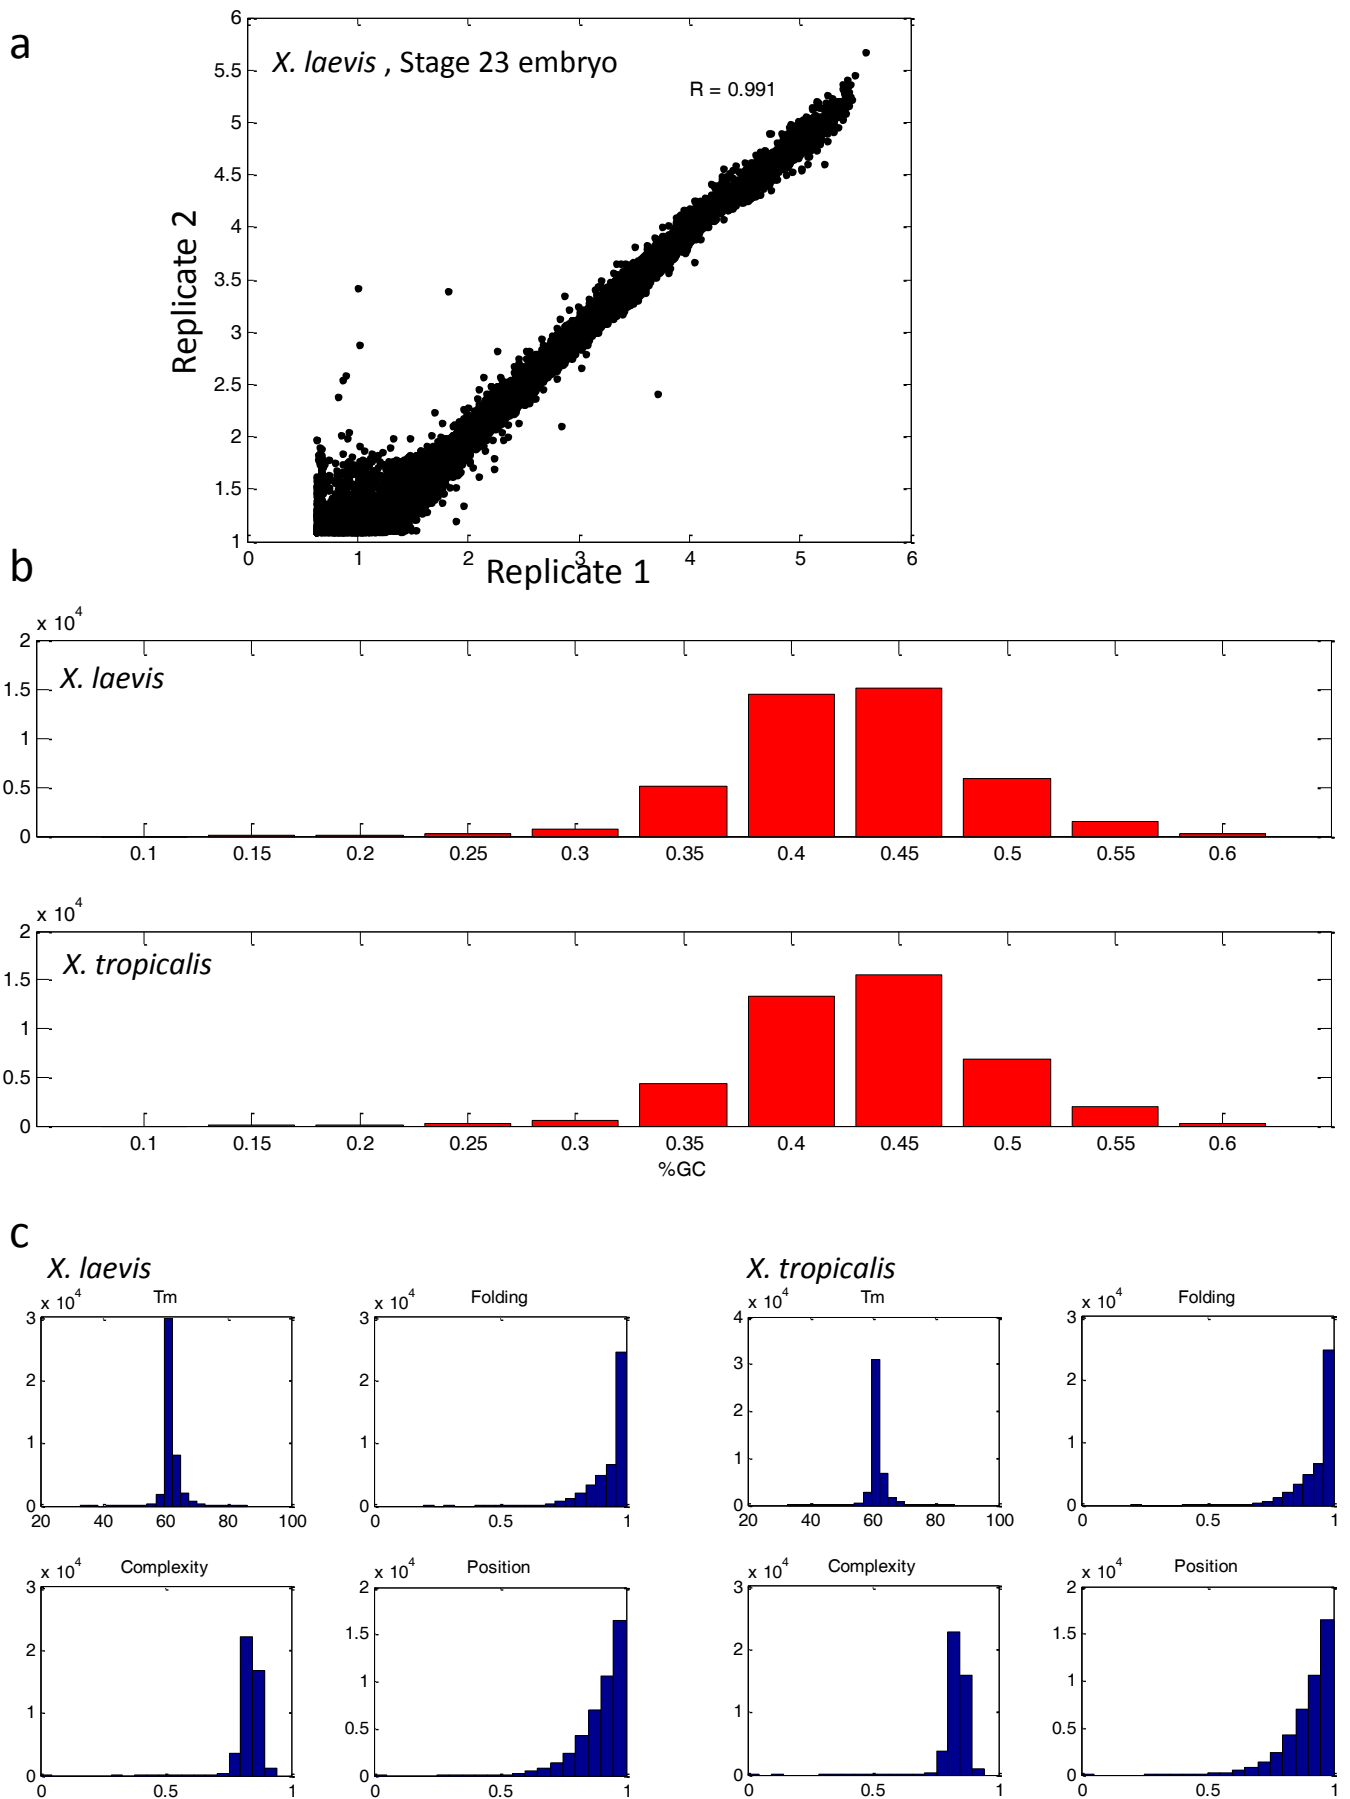

Figure S1

a

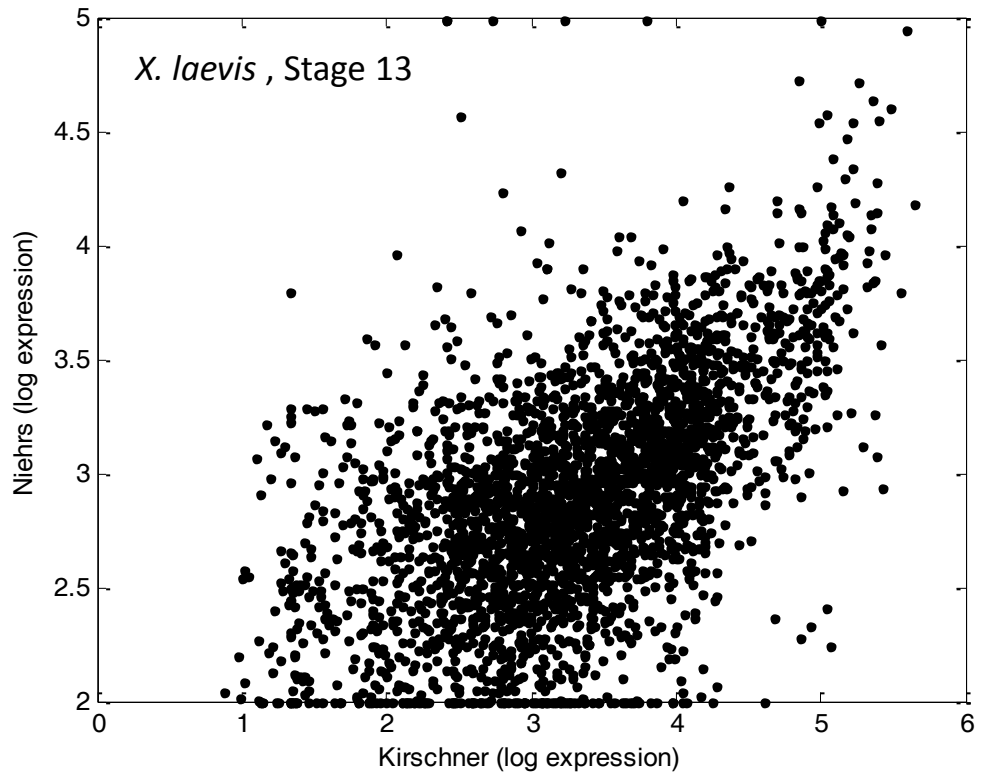

b

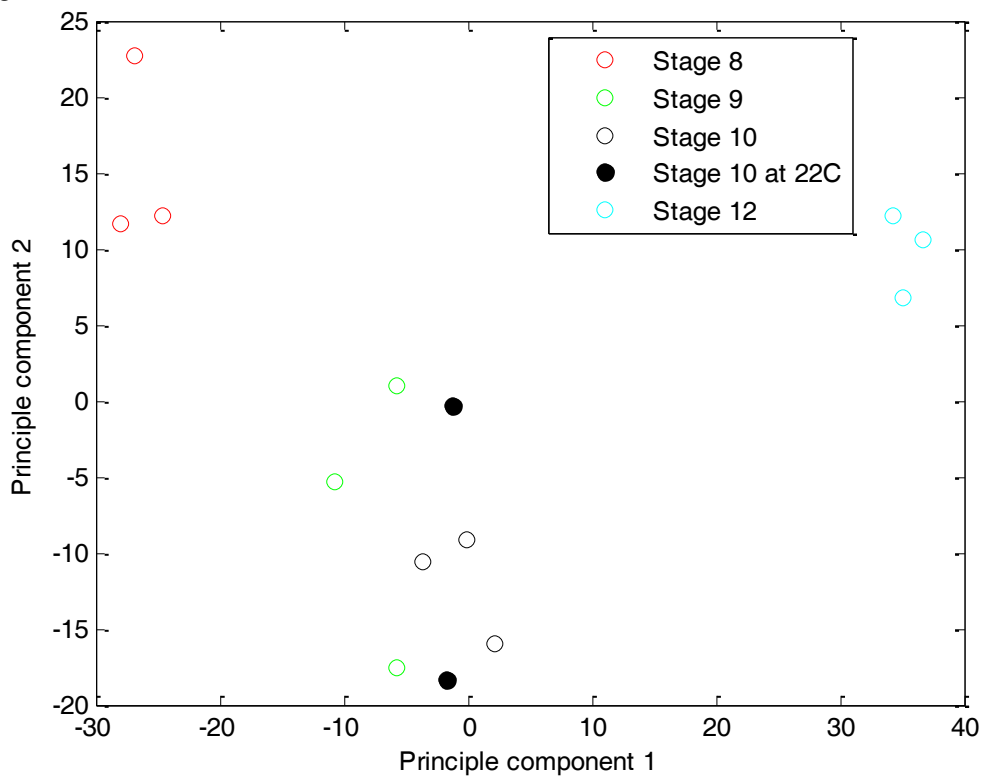

Figure S2

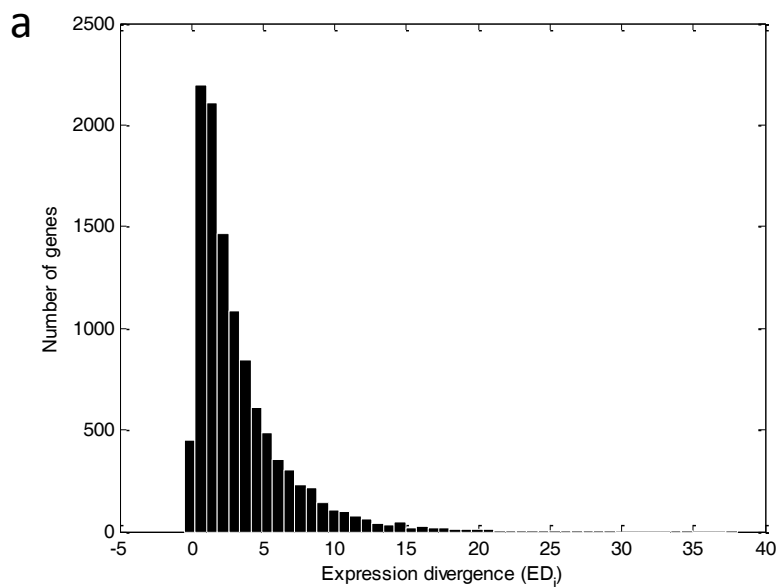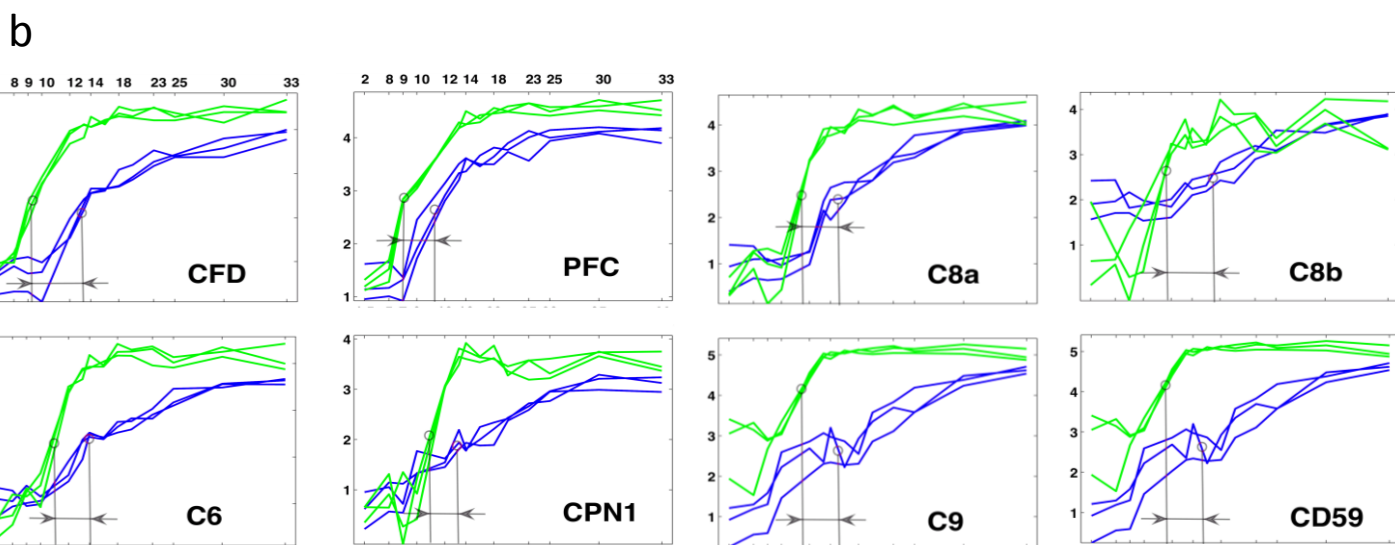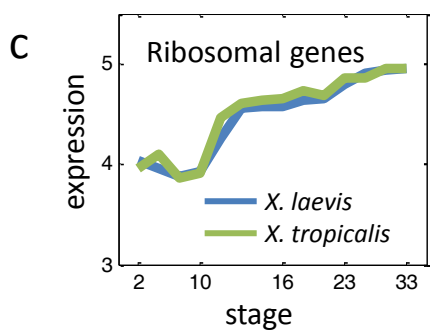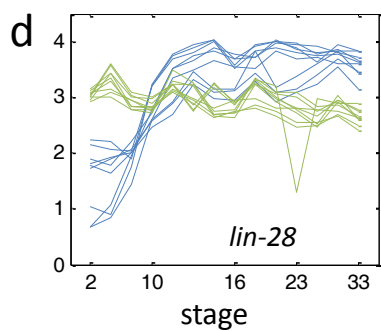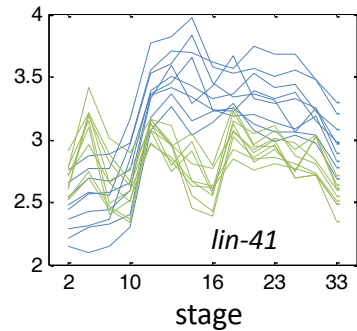

Figure S3

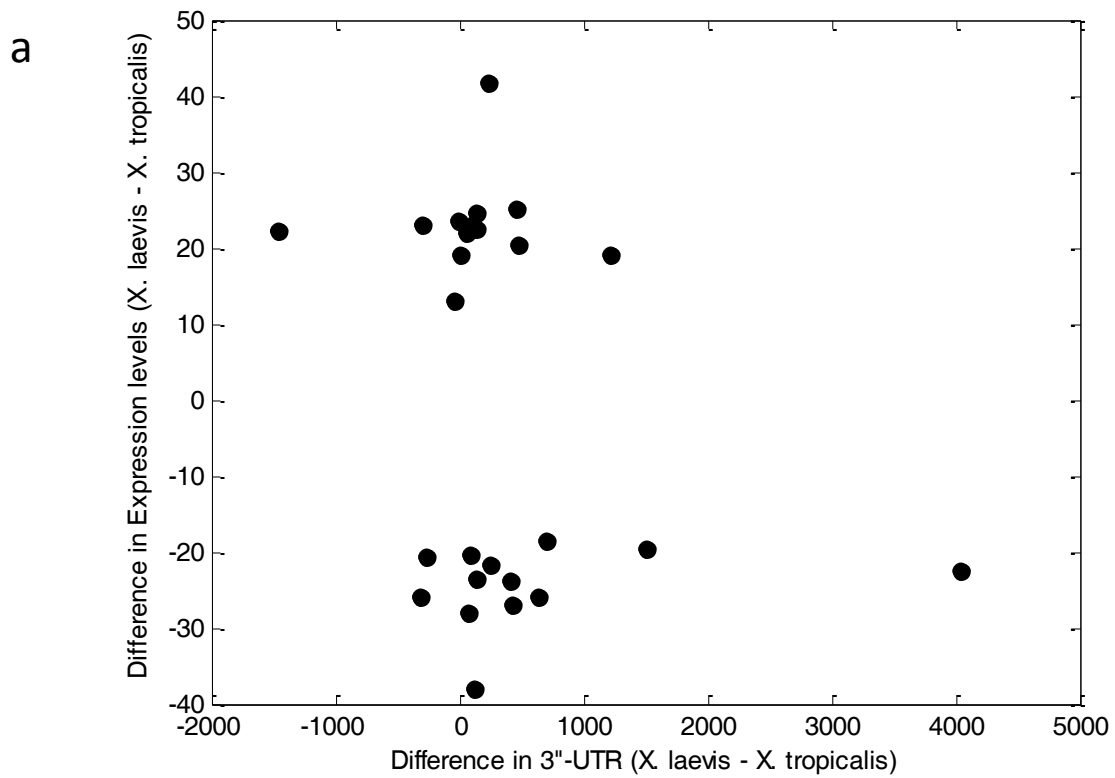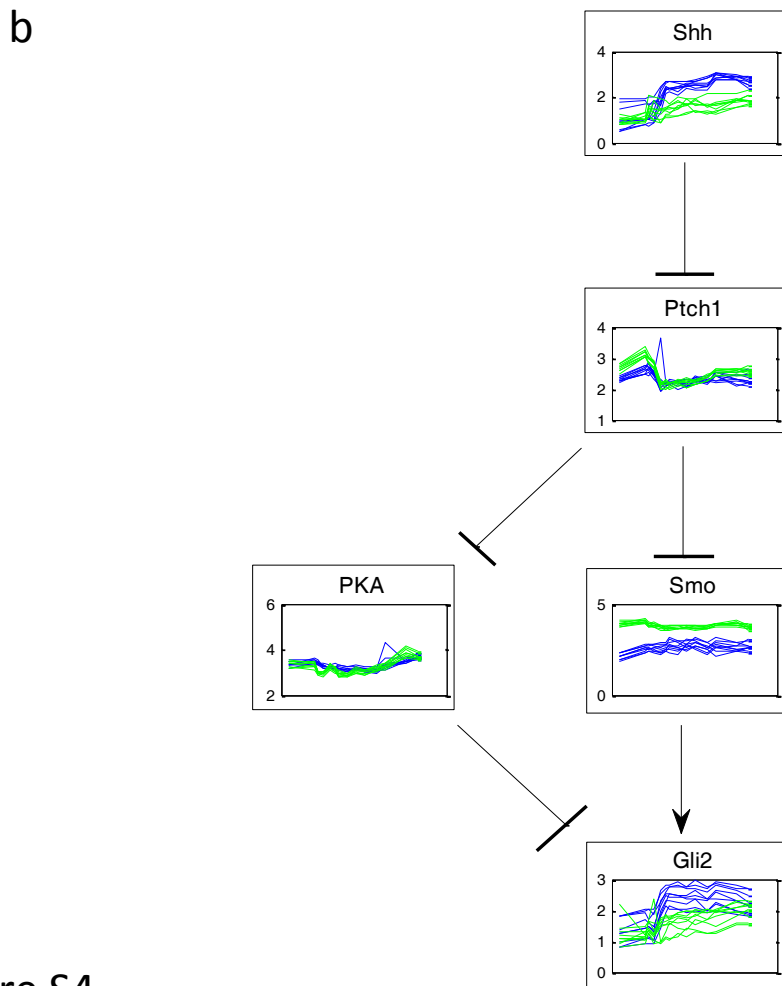

Figure S4

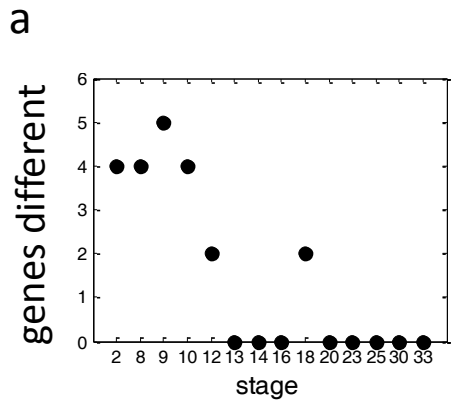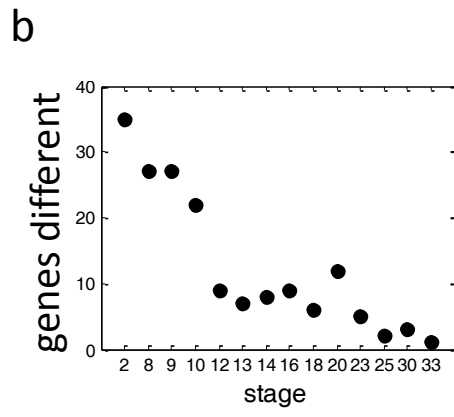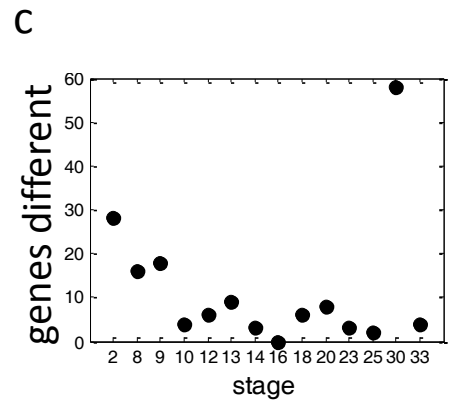

Figure S5
